# Supplementary material for: Live-Cell Dynamic Sensing of Cd2+ with a FRET-Based Indicator
Source: PubMed Central journal article supplement (PMC3679114; doi:10.1371/journal.pone.0065853), 2013-06-11
Supplement: pone.0065853.s007.pdf [file pone.0065853.s007.pdf]

## References for supplementary information

1. Chuang TY, Au LC, Wang LC, Ho LT, Yang DM, Juan CC (2012) Potential effect of resistin on the ET-1-increased reactions of blood pressure in rats and  $\text{Ca}^{2+}$  signaling in vascular smooth muscle cells. *J Cell Physiol* 227: 1610-1618.
2. Huang PC, Chiu TY, Wang LC, Teng HC, Kao FJ, Yang DM (2010) Visualization of the Orai1 homodimer and the functional coupling of Orai1-STIM1 by live-cell fluorescence lifetime imaging. *Microscop Microanal* 16: 313-326.
